# Supplementary material
Source: PubMed Central journal article supplement (PMC5708302)
Supplement: ry162837suppa1.pdf [file ry162837suppa1.pdf]

**Table E1. Baseline Characteristics of Recalled Patients and Patients Recommended for Short-Interval Follow-up Excluding Second DBT Examination**

| Characteristic                    | Cohort 1: DM<br>(n = 10 728) | Cohort 2: DBT<br>(n = 13 878) | P Value |
|-----------------------------------|------------------------------|-------------------------------|---------|
| No. of women                      | 1112 (10.4)                  | 1266 (9.1)                    | .001    |
| Age (y)                           | 54.2 ± 10.4                  | 53.6 (10.6)                   | .127    |
| Age categories (y)                |                              |                               |         |
| <40                               | 30 (2.7)                     | 36 (2.8)                      | .306    |
| 40–49                             | 415 (37.3)                   | 508 (40.1)                    | ...     |
| 50–59                             | 350 (31.5)                   | 401 (31.7)                    | ...     |
| 60–69                             | 224 (20.1)                   | 213 (16.8)                    | ...     |
| ≥70                               | 93 (8.4)                     | 108 (8.5)                     | ...     |
| Body mass index*                  | 29.5 ± 7.4                   | 29.6 ± 7.2                    | .804    |
| Race                              |                              |                               |         |
| White                             | 429 (38.6)                   | 471 (37.2)                    | .209    |
| Black                             | 589 (53.0)                   | 673 (53.2)                    | ...     |
| Hispanic                          | 11 (1.0)                     | 22 (1.7)                      | ...     |
| Asian                             | 37 (3.3)                     | 32 (2.5)                      | ...     |
| Other/Unknown                     | 46 (4.1)                     | 68 (5.4)                      | ...     |
| Breast density                    |                              |                               |         |
| BI-RADS category 1<br>(0%–25%)    | 69 (6.2)                     | 91 (7.2)                      | .573    |
| BI-RADS category 2<br>(26%–50%)   | 598 (53.8)                   | 672 (53.1)                    | ...     |
| BI-RADS category 3<br>(51%–75%)   | 429 (38.6)                   | 478 (37.8)                    | ...     |
| BI-RADS category 4 (76%–<br>100%) | 16 (1.4)                     | 25 (2.0)                      | ...     |
| Prior study                       |                              |                               |         |
| No                                | 247 (22.2)                   | 298 (23.5)                    | .443    |
| Yes                               | 865 (77.8)                   | 968 (76.5)                    | ...     |

Note.—Unless otherwise indicated, data are the number of patients and data in parentheses are percentages.

\* Data are means ± standard deviation.
